# Supplementary material for: Molecular Dynamic Simulations of Bromodomain and Extra-Terminal Protein 4 Bonded to Potent Inhibitors
Source: MDPI journal article supplement (doi:10.3390/molecules27010118), 2021-12-26
Supplement: s1 [file s1]

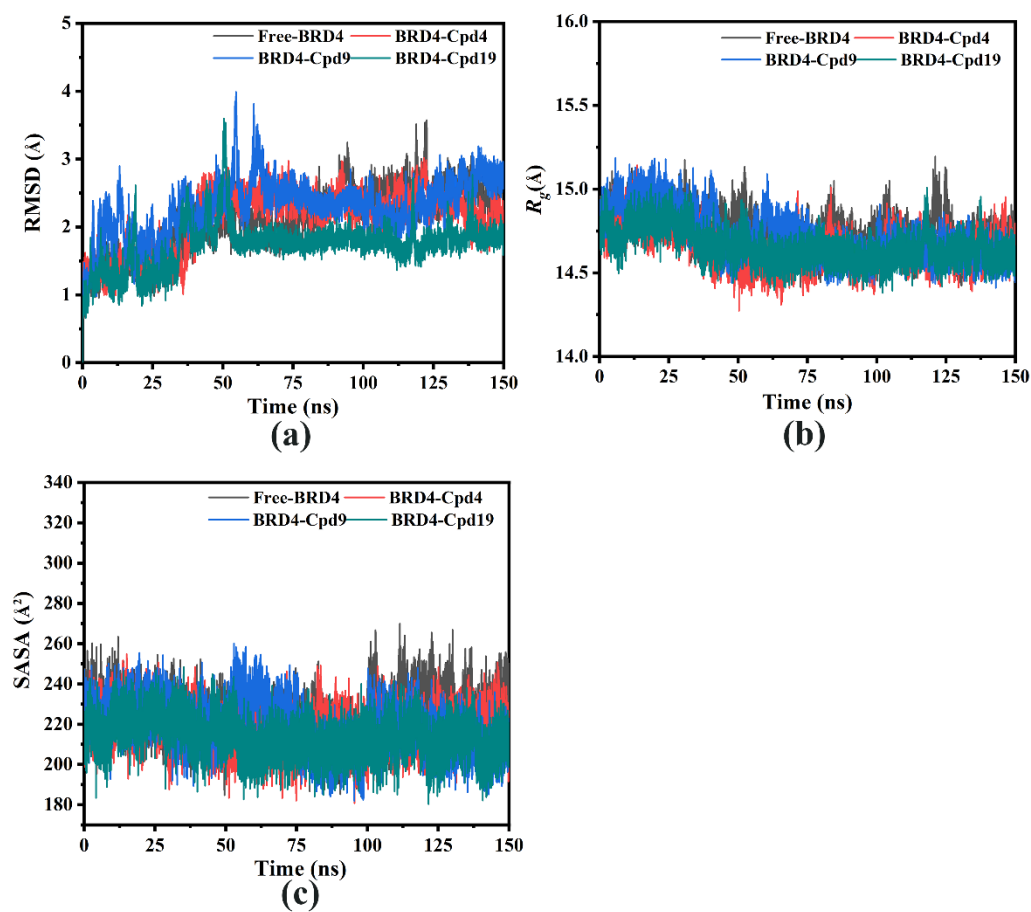

**Figure S1.** (a) Root-mean-square deviation (RMSD) for the backbone atoms, (b) Radius-of-gyration ( $R_g$ ) plot, (c) Solvent-accessible-surface-area (SASA) plot of the second MD simulation

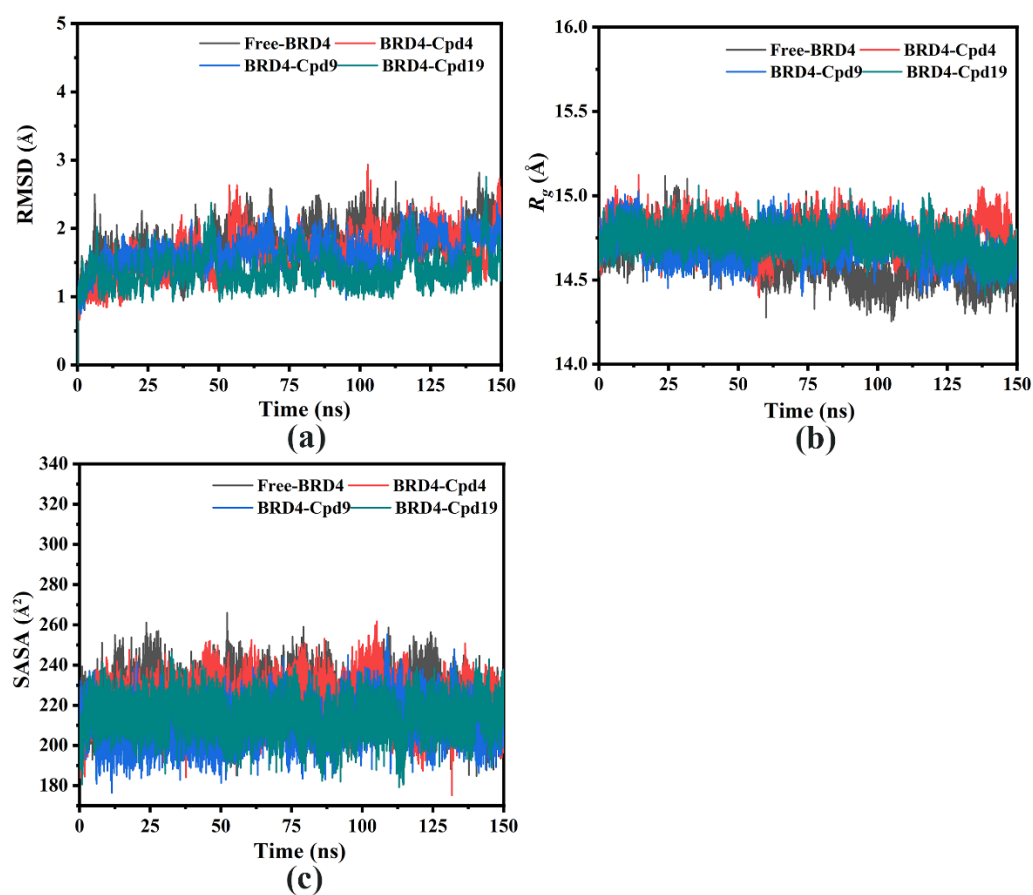

**Figure S2.** (a) Root-mean-square deviation (RMSD) for the backbone atoms, (b) Radius-of-gyration ( $R_g$ ) plot, (c) Solvent-accessible-surface-area (SASA) plot of the third time MD simulation.

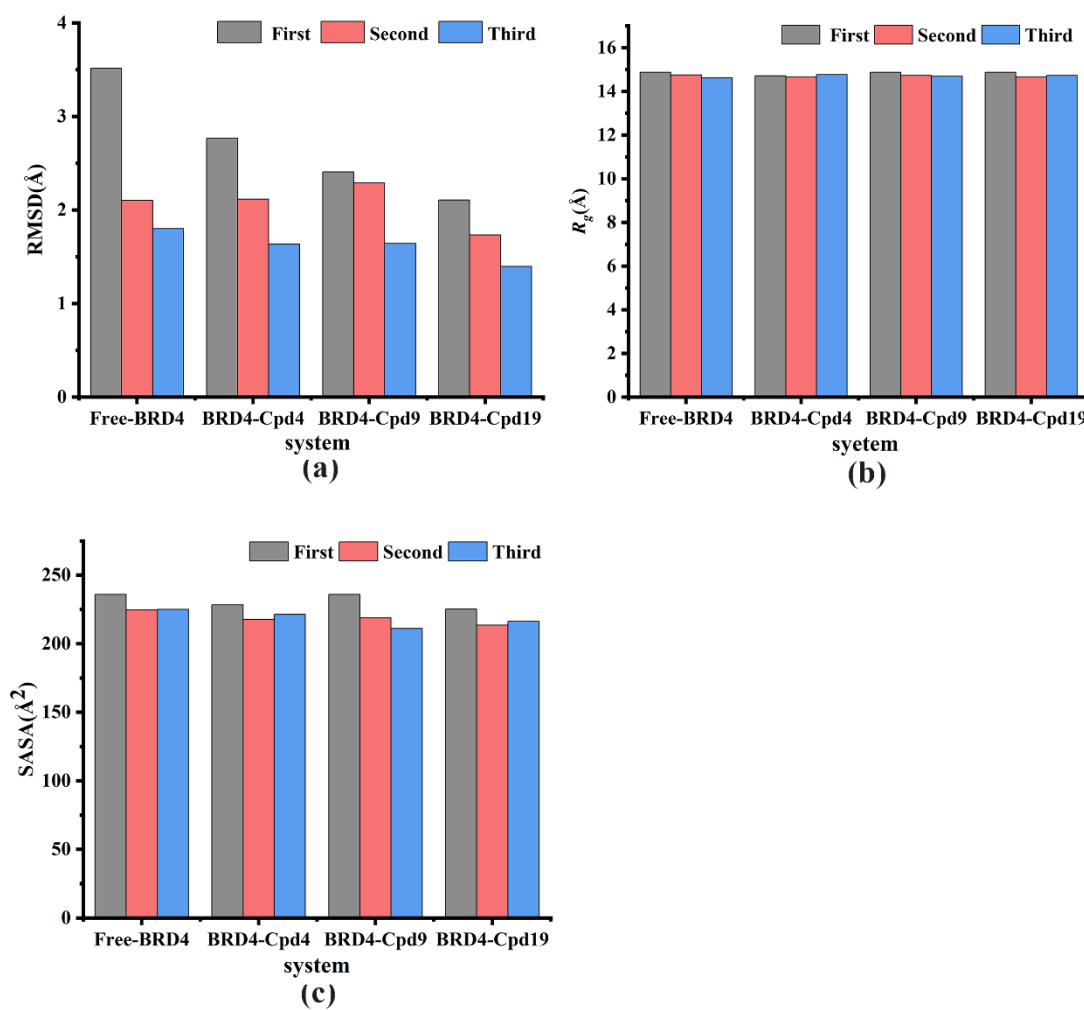

**Figure S3.** (a) average Root-mean-square deviation (RMSD) for the backbone atoms, (b) average Radius-of-gyration ( $R_g$ ) plot of the third time MD simulation, (c) average Solvent-accessible-surface-area (SASA) plot.

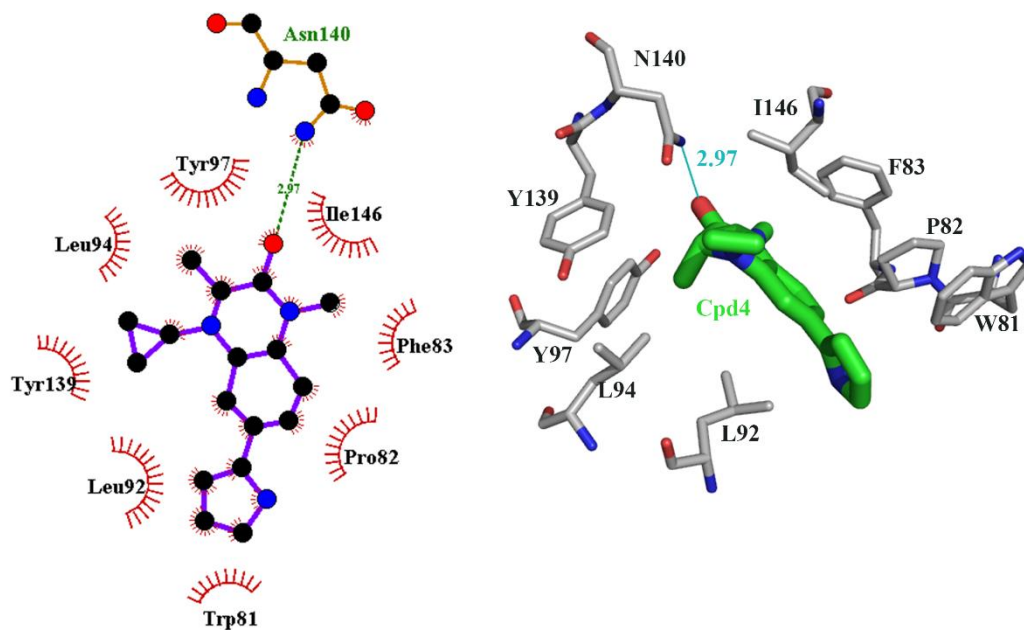

**Figure S4.** Binding pocket of The active residues around Cpd 4 binding to BRD4

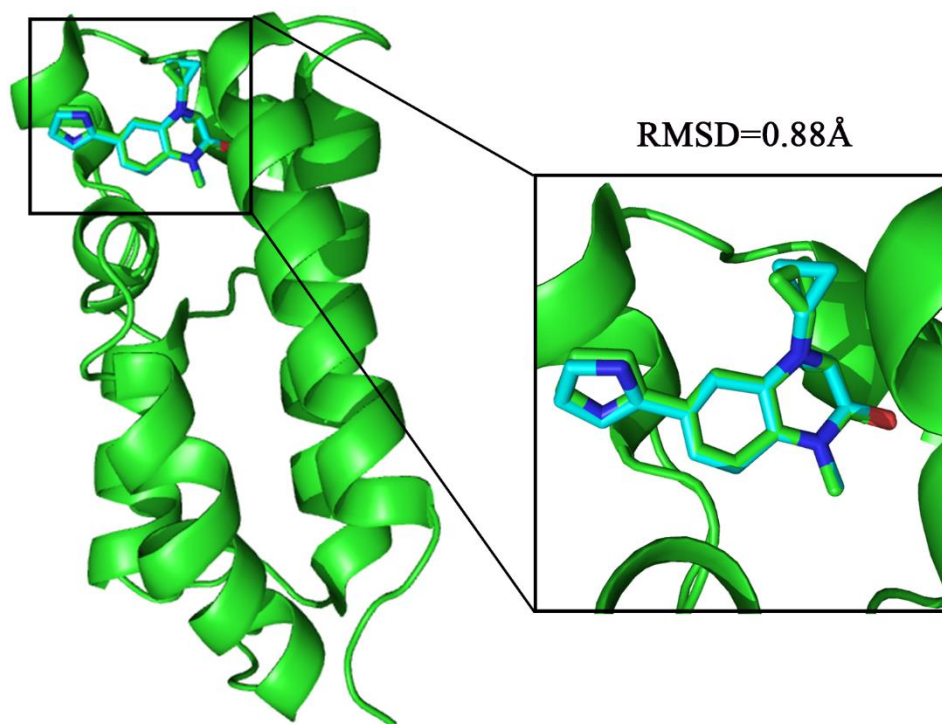

**Figure S5.** Cpd 4 redocked to the pocket of BRD4 with AutoDock 4.2.6 software to compared with the docking pose of 6JI3. ( blue is Cpd4 of 6JI3 and green is redock Cpd4 )
